# Supplementary material for: Efficient Combination of Complex Chromatography, Molecular Docking and Enzyme Kinetics for Exploration of Acetylcholinesterase Inhibitors from Poria cocos
Source: MDPI journal article supplement (doi:10.3390/molecules28031228), 2023-01-27
Supplement: s1 [file s1]

**Table S1.** Molecular docking analysis of potential acetylcholinesterase ligand in Huperzine A and *P.cocos*.

| No. | Ligand name                | Ligand structure                                                                    | Binding energy<br>(kcal • mol <sup>-1</sup> ) | Interactions<br>amino acid    |
|-----|----------------------------|-------------------------------------------------------------------------------------|-----------------------------------------------|-------------------------------|
| 1   | Tumulosic acid             | 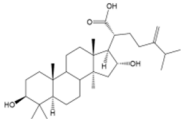   | -7.77                                         | PHE-288<br>ARG-289            |
| 2   | Polyporenic acid<br>C      |    | -7.88                                         | PHE-288<br>SER-286<br>ARG-289 |
| 3   | 3-Epidehydrotumulosic acid |    | -7.37                                         | PHE-288<br>ARG-289            |
| 4   | Pachymic acid              |  | -8.01                                         | PHE-288<br>ARG-289            |
| 5   | Dehydro-trametenolic acid  |  | -6.92                                         | PHE-288                       |
| 6   | Huperzine A                |  | -7.51                                         | SER-235                       |

**Table S2.** Main features of AChE inhibition by active compounds.

|                                                          | Compound 1                                            | Compound 2                                                          | Compound 3                                                  | Compound 4                                                         | Compound 5                                                                |
|----------------------------------------------------------|-------------------------------------------------------|---------------------------------------------------------------------|-------------------------------------------------------------|--------------------------------------------------------------------|---------------------------------------------------------------------------|
| Name                                                     | Tumulosic acid                                        | Polyporenic acid C                                                  | 3-Epidehydrotumulosic acid                                  | Pachymic acid                                                      | Dehydro-trametenolic acid                                                 |
| <sup>1</sup> H-NMR<br>(400 MHz,<br>CDCl <sub>3</sub> ) δ | δ: 1.00 (3H, s,<br>H-27), 1.06 (3H,<br>s, H-28), 1.14 | δ: 4.97, 4.88 (1H, s,<br>H-31), 1.43 (3H, s,<br>H-30), 1.11 (3H, s, | δ: 5.66 (1H, s,<br>H-7), 5.53 (1H, d, J<br>= 6.0 Hz, H-11), | δ: 4.98, 4.71 (1H, s,<br>H-31), 4.06 (1H, t,<br>J = 6.4 Hz, H-16), | δ: 5.33 (1H, d, J = 6.5<br>Hz, H-24), 1.65 (3H,<br>s, H-26), 1.61 (3H, s, |

|                                                     |                                                                                                                                                                                                                                                                                                                                                                                                                  |                                                                                                                                                                                                                                                                                                                                                                                                                     |                                                                                                                                                                                                                                                                                                                                                                                                                    |                                                                                                                                                                                                                                                                                                                                                                                                                                                                         |                                                                                                                                                                                                                                                                                                                                                                                                       |
|-----------------------------------------------------|------------------------------------------------------------------------------------------------------------------------------------------------------------------------------------------------------------------------------------------------------------------------------------------------------------------------------------------------------------------------------------------------------------------|---------------------------------------------------------------------------------------------------------------------------------------------------------------------------------------------------------------------------------------------------------------------------------------------------------------------------------------------------------------------------------------------------------------------|--------------------------------------------------------------------------------------------------------------------------------------------------------------------------------------------------------------------------------------------------------------------------------------------------------------------------------------------------------------------------------------------------------------------|-------------------------------------------------------------------------------------------------------------------------------------------------------------------------------------------------------------------------------------------------------------------------------------------------------------------------------------------------------------------------------------------------------------------------------------------------------------------------|-------------------------------------------------------------------------------------------------------------------------------------------------------------------------------------------------------------------------------------------------------------------------------------------------------------------------------------------------------------------------------------------------------|
|                                                     | (3H, s, H-18), 0.96, 0.99 (3H, d, $J$ = 6.6 Hz, H-26, 27), 1.24 (3H, s, H-18), 1.45 (3H, s, H-30), 2.32 (1H, m, H-25), 2.94 (1H, d, $J$ = 11.4 Hz, H-17), 2.95 (1H, m, H-20), 4.55 (1H, t, $J$ = 6.0 Hz, H-16), 3.44 (1H, t, $J$ = 6.0 Hz, H-3) 4.81, 4.97 (1H, s, H-31)                                                                                                                                         | H-29), 1.12 (3H, s, H-19), 1.08 (3H, s, H-18), 1.06 (3H, s, H-28), 0.98, 0.96 (3H, d, $J$ = 6.5 Hz, H-26, 27)                                                                                                                                                                                                                                                                                                       | 5.01 (1H, s, H-31), 4.59 (1H, t, $J$ = 6.5 Hz, H-16), 2.97 (1H, m, H-20), 2.93 (1H, m, H-17), 2.33 (1H, m, H-25), 1.46 (3H, s, H-30), 1.22 (3H, s, H-28), 1.13 (3H, s, H-19), 1.07 (3H, s, H-18), 1.04, 0.96 (3H, d, $J$ = 6.5 Hz, H-26, 27), 0.99 (3H, s, H-29)                                                                                                                                                   | 2.33 (1H, m, H-25), 2.37 (1H, m, H-20), 1.74 (1H, dd, $J$ = 11.2, 5.5 Hz, H-17), 1.54 (3H, s, H-30), 1.17 (3H, s, H-18), 1.12, 1.10 (3H, d, $J$ = 6.4 Hz, H-26, 27), 1.02 (3H, s, H-28), 0.97 (3H, s, H-29), 0.98 (3H, s, H-19)                                                                                                                                                                                                                                         | H-27), 1.20 (3H, s, H-28), 1.13 (3H, s, H-29), 1.04 (6H, s, H-19, 30), 0.99 (3H, s, H-18)                                                                                                                                                                                                                                                                                                             |
| <sup>13</sup> C-NMR (100 MHz, CDCl <sub>3</sub> ) δ | δ: 178.3 (C-21), 156.1 (C-24), 134.4 (C-9), 135.5 (C-8), 27.4 (C-7), 21.1 (C-11), 106.7 (C-31), 77.8 (C-3), 76.6 (C-16), 57.2 (C-17), 49.1 (C-14), 48.8 (C-20), 46.7 (C-13), 44.5 (C-15), 51.2 (C-5), 39.6 (C-4), 37.9 (C-10), 30.2 (C-12), 34.5 (C-25), 33.5 (C-23), 31.7 (C-22), 36.8 (C-1), 29.3 (C-28), 25.6 (C-30), 29.2 (C-2), 19.5 (C-6), 17.1 (C-29), 20.1 (C-19), 22.1 (C-26), 21.8 (C-27), 17.9 (C-18) | δ: 214.2 (C-3), 178.5 (C-21), 155.8 (C-24), 144.2 (C-9), 141.5 (C-8), 120.8 (C-7), 116.5 (C-11), 106.8 (C-31), 75.5 (C-16), 56.4 (C-17), 50.6 (C-5), 48.4 (C-14), 46.3 (C-4), 45.6 (C-13), 44.3 (C-15), 36.6 (C-10), 36.3 (C-12), 35.9 (C-1), 34.0 (C-25), 33.7 (C-23), 33.4 (C-2), 31.2 (C-22), 26.3 (C-29), 25.5 (C-30), 23.1 (C-6), 22.6 (C-20), 21.6 (C-26), 21.7 (C-19), 21.6 (C-27), 21.3 (C-28), 16.4 (C-18) | δ: 177.5 (C-21), 153.6 (C-24), 145.3 (C-9), 141.5 (C-8), 115.5 (C-11), 121.8 (C-7), 106.6 (C-31), 77.6 (C-16), 74.8 (C-3), 56.4 (C-17), 49.7 (C-20), 49.4 (C-14), 44.8 (C-13), 43.5 (C-5), 44.2 (C-15), 37.5 (C-12), 36.7 (C-10), 36.6 (C-4), 34.4 (C-25), 33.6 (C-23), 31.3 (C-22), 31.4 (C-1), 27.1 (C-28), 26.5 (C-30), 26.4 (C-2), 24.2 (C-6), 23.4 (C-29), 22.7 (C-19), 22.0 (C-26), 20.3 (C-27), 16.7 (C-18) | δ: 177.4 (C-21), 170.6 (CH <sub>3</sub> CO), 155.9 (C-24), 135.4 (C-8), 134.8 (C-9), 106.2 (C-31), 80.8 (C-3), 77.6 (C-16), 56.5 (C-17), 50.9 (C-5), 49.6 (C-20), 49.3 (C-14), 45.4 (C-13), 44.1 (C-15), 37.3 (C-4), 36.8 (C-10), 34.8 (C-1), 34.2 (C-25), 33.7 (C-23), 31.2 (C-22), 29.4 (C-12), 27.4 (C-28), 26.9 (C-7), 25.5 (C-30), 24.7 (C-2), 21.6 (C-26), 21.5 (C-27), 21.0 (C-11), 20.9 (CH <sub>3</sub> CO), 19.6 (C-19), 18.1 (C-6), 16.7 (C-18), 16.5 (C-29) | δ: 177.4 (C-21), 145.7 (C-9), 141.2 (C-8), 130.3 (C-25), 123.9 (C-24), 120.3 (C-7), 115.5 (C-11), 76.9 (C-3), 48.5 (C-5), 48.5 (C-20), 48.1 (C-14), 47.5 (C-17), 43.4 (C-13), 38.6 (C-4), 36.4 (C-10), 35.3 (C-1), 35.1 (C-12), 31.2 (C-22), 30.1 (C-15), 27.6 (C-2), 27.2 (C-28), 26.0 (C-16), 24.7 (C-23), 24.6 (C-26), 24.4 (C-30), 21.7 (C-6), 21.8 (C-19), 16.5 (C-27), 15.8 (C-29), 15.5 (C-18) |

**Table S3.** Kinetic parameters of AChE inhibition by active compounds.

| Active compound | Sample (μmol) | Michaelis-Menten equation       | R <sup>2</sup> | $K_m^{app}$ / ( $K_m^{app}$ ) | $V_m^{app}$ / ( $V_m^{app}$ ) | K <sub>i</sub> (μM) | K <sub>is</sub> (μM) |
|-----------------|---------------|---------------------------------|----------------|-------------------------------|-------------------------------|---------------------|----------------------|
| Pachymic acid   | 0             | 1/v = 885.6721/[S]+49.6839      | 0.9998         | 17.82                         | 0.022                         | 1.83                |                      |
|                 | 10            | 1/v = 3957.3928 / [S] + 49.7832 | 0.9980         | 65.91                         | 0.022                         |                     |                      |

|                                   |    |                                    |        |        |        |       |       |
|-----------------------------------|----|------------------------------------|--------|--------|--------|-------|-------|
| Polyporenic<br>acid C             | 15 | $1/v = 5539.1520 / [S] + 49.3591$  | 0.9979 | 94.61  | 0.022  |       |       |
|                                   | 20 | $1/v = 7393.5920 / [S] + 49.6934$  | 0.9946 | 132.94 | 0.022  |       |       |
|                                   | 0  | $1/v = 885.6721 / [S] + 49.6839$   | 0.9979 | 17.78  | 0.020  |       |       |
|                                   | 10 | $1/v = 1030.1048 / [S] + 59.5395$  | 0.9835 | 17.65  | 0.017  | 51.47 |       |
|                                   | 15 | $1/v = 1145.8393 / [S] + 68.5693$  | 0.9994 | 17.61  | 0.015  |       |       |
| Tumulosic<br>acid                 | 20 | $1/v = 1245.6549 / [S] + 73.7946$  | 0.9835 | 17.47  | 0.011  |       |       |
|                                   | 0  | $1/v = 885.6721 / [S] + 49.6839$   | 0.9914 | 17.82  | 0.020  |       |       |
|                                   | 10 | $1/v = 1323.1145 / [S] + 74.2773$  | 0.9782 | 17.83  | 0.014  | 16.98 |       |
|                                   | 15 | $1/v = 1715.8828 / [S] + 95.9198$  | 0.9976 | 17.79  | 0.010  |       |       |
|                                   | 20 | $1/v = 2839.2280 / [S] + 118.3527$ | 0.9849 | 17.81  | 0.009  |       |       |
| 3-Epidehydr<br>otumulosic<br>acid | 0  | $1/v = 885.6721 / [S] + 49.6839$   | 0.9859 | 17.82  | 0.020  |       |       |
| Dehydro-<br>trametenolic<br>acid  | 10 | $1/v = 1323.1145 / [S] + 74.2773$  | 0.9944 | 25.43  | 0.0087 | 3.17  | 7.21  |
|                                   | 15 | $1/v = 1715.8828 / [S] + 95.9198$  | 0.9902 | 30.63  | 0.0064 | 6.24  |       |
|                                   | 20 | $1/v = 2246.4298 / [S] + 118.3527$ | 0.9834 | 17.81  | 0.0042 |       |       |
|                                   | 0  | $1/v = 885.6721 / [S] + 49.6839$   | 0.9975 | 17.82  | 0.020  |       |       |
|                                   | 10 | $1/v = 1857.6611 / [S] + 80.0579$  | 0.9942 | 23.20  | 0.014  | 8.21  | 17.38 |
|                                   | 15 | $1/v = 2969.9629 / [S] + 133.5642$ | 0.9839 | 49.73  | 0.009  | 8.93  |       |
|                                   | 20 | $1/v = 4753.8244 / [S] + 49.6839$  | 0.9834 | 93.57  | 0.020  |       |       |
